# Supplementary material for: Translational Modeling Identifies Synergy between Nanoparticle-Delivered miRNA-22 and Standard-of-Care Drugs in Triple Negative Breast Cancer
Source: bioRxiv or medRxiv preprint supplement (doi:10.1101/2021.10.19.21265154), 2021-10-26

## Supplementary Information

### Translational Modeling Identifies Synergy between Nanoparticle-Delivered miRNA-22 and Standard-of-Care Drugs in Triple Negative Breast Cancer

Prashant Dogra,<sup>1,2</sup> Javier Ruiz Ramírez,<sup>1</sup> Joseph D. Butner,<sup>1</sup> Maria J. Peláez,<sup>1</sup> Caroline Chung,<sup>3</sup> Anupama Hooda-Nehra,<sup>4,5</sup> Renata Pasqualini,<sup>4,6</sup> Wadih Arap,<sup>4,5</sup> Vittorio Cristini,<sup>1,7,8</sup> George A. Calin,<sup>9</sup> Bulent Ozpolat,<sup>10</sup> Zhihui Wang<sup>1,2,7,\*</sup>

<sup>1</sup>Mathematics in Medicine Program, Houston Methodist Research Institute, Houston, TX 77030, USA;

<sup>2</sup>Department of Physiology and Biophysics, Weill Cornell Medical College, New York, NY 10065, USA;

<sup>3</sup>Department of Radiation Oncology, The University of Texas MD Anderson Cancer Center, Houston, TX 77030, USA;

<sup>4</sup>Rutgers Cancer Institute of New Jersey, Newark, NJ 07101, USA;

<sup>5</sup>Department of Medicine, Division of Hematology/Oncology, Rutgers New Jersey Medical School, Newark, NJ 07103, USA;

<sup>6</sup>Department of Radiation Oncology, Division of Cancer Biology, Rutgers New Jersey Medical School, Newark, NJ 07103, USA;

<sup>7</sup>Department of Imaging Physics, The University of Texas M.D. Anderson Cancer Center, Houston, TX 77230, USA;

<sup>8</sup>Physiology, Biophysics, and Systems Biology Program, Graduate School of Medical Sciences, Weill Cornell Medicine, New York, NY 10065, USA;

<sup>9</sup>Department of Translational Molecular Pathology, The University of Texas MD Anderson Cancer Center, Houston, TX 77030, USA;

<sup>10</sup>Department of Experimental Therapeutics, The University of Texas MD Anderson Cancer Center, Houston, TX 77030, USA.

**Short title:** Modeling miR-22 therapy in TNBC

**Keywords:** Cancer treatment, mathematical modeling, microRNA, pharmacokinetics and pharmacodynamics, precision medicine, tumor-immune interaction, allometry

### Invited Contribution

Correspondence should be addressed to:

**Zhihui Wang, Ph.D.**

Associate Professor, Mathematics in Medicine Program

The Houston Methodist Research Institute

Phone: (713) 441-7291

Email: [zwang@houstonmethodist.org](mailto:zwang@houstonmethodist.org)

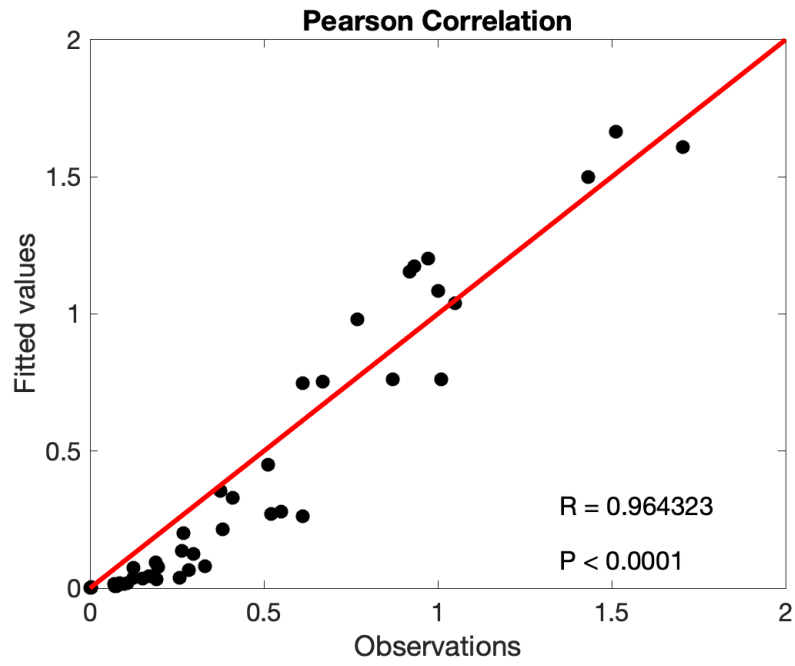

**Figure S1.** Pearson correlation of model fits to *in vivo* data shown in Figure 2.

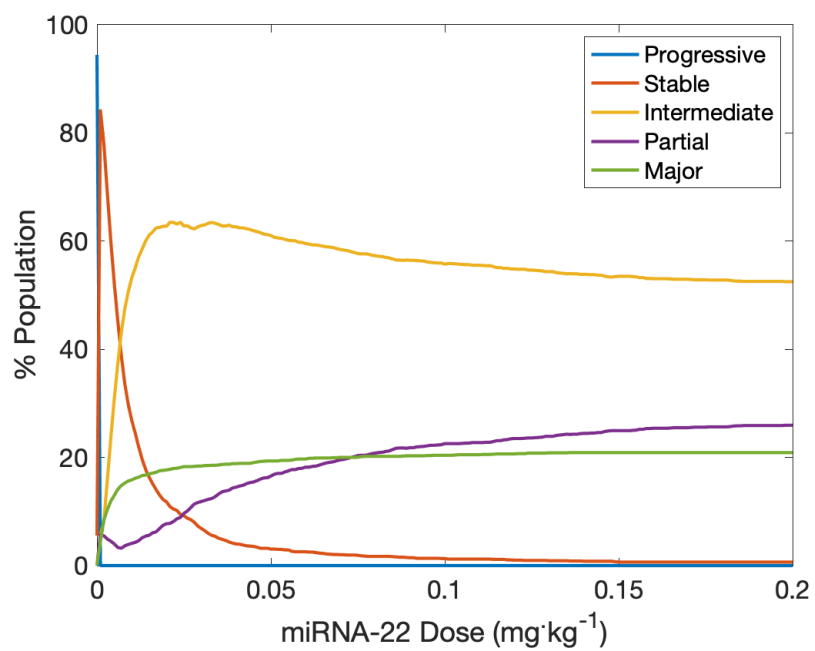

**Figure S2.** Population-scale dose response relationship of miRNA-22 therapy.

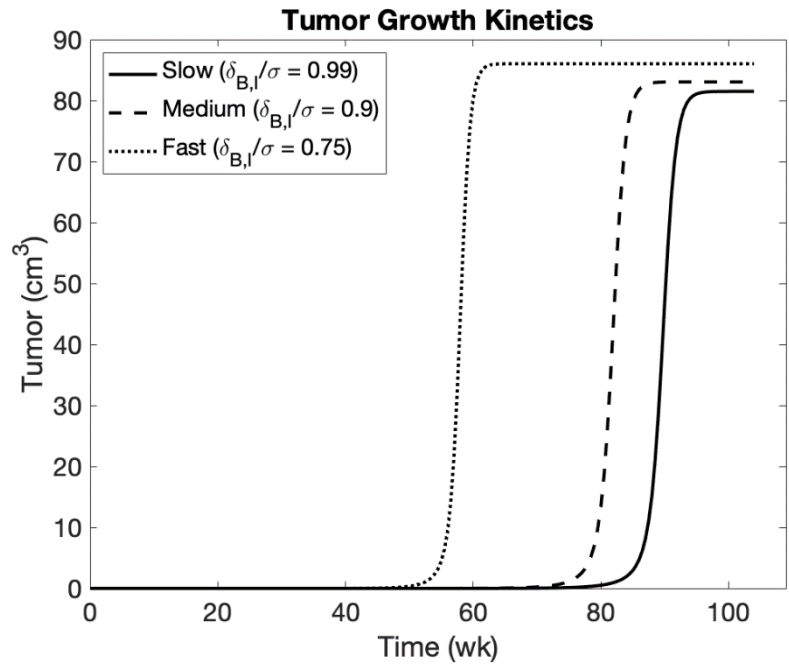

**Figure S3.** Tumor growth kinetics of slow-, medium-, and fast-growing tumors under the control conditions.

# CompuSyn Report

**Experiment Name:** AAPS paper  
**Date:** 7/14/21  
**File Name:** C:\Users\prash\Desktop\report.cse  
**Description**

**Drug:** mirna22 (mirna) [mg/kg]  
**Drug:** dox (dox) [mg/kg]  
**Drug:** ate (ate) [mg/kg]  
**Drug Combo:** mirna+dox (mirdox) (mirna+dox)  
**Drug Combo:** mirna+ate (mirate) (mirna+ate)  
**Drug Combo:** mirnadoxate (mda) (mirna+dox+ate)

---

Data for Drug: mima [mg/kg]

| Dose   | Effect |
|--------|--------|
| 0.01   | 0.2017 |
| 0.0311 | 0.3087 |
| 0.0522 | 0.3466 |
| 0.0733 | 0.3662 |
| 0.0944 | 0.3782 |
| 0.1156 | 0.3864 |
| 0.1367 | 0.3922 |
| 0.1578 | 0.3966 |
| 0.1789 | 0.4001 |
| 0.2    | 0.4029 |

10 data points entered.

**X-int:** -0.2695

**Y-int:** 0.08429 +/- 0.03407

**m:** 0.31277 +/- 0.02925

**Dm:** 0.53764

**r:** 0.96676

---

Data for Drug: dox [mg/kg]

| Dose | Effect |
|------|--------|
| 0.01 | 0.0012 |
| 1.12 | 0.0589 |
| 2.23 | 0.087  |
| 3.34 | 0.1068 |
| 4.45 | 0.1225 |
| 5.56 | 0.1352 |
| 6.67 | 0.146  |
| 7.78 | 0.1553 |
| 8.89 | 0.1635 |

**Dose Effect**

10.0 0.1708

10 data points entered.

**X-int:** 1.81569**Y-int:** -1.3608 +/- 0.02420**m:** 0.74946 +/- 0.02588**Dm:** 65.4173**r:** 0.99526

## Data for Drug: ate [mg/kg]

**Dose Effect**

0.01 0.08402

1.12 0.08454

2.23 0.08454

3.34 0.08455

4.45 0.08455

5.56 0.08455

6.67 0.08455

7.78 0.08455

8.89 0.08455

10.0 0.08455

10 data points entered.

**X-int:** 1033.99**Y-int:** -1.0352 +/- 1.13E-4**m:** 0.00100 +/- 1.20E-4**Dm:** Infinit**r:** 0.94670

## Data for Non-Constant Combo: mirdox (mirna+dox)

**Dose mirna Dose dox Effect**

0.01 0.01 0.2064

0.0311 1.12 0.5982

0.0522 2.23 0.7995

0.0733 3.34 0.8892

0.0944 4.45 0.9291

0.1156 5.56 0.9493

0.1367 6.67 0.9609

0.1578 7.78 0.9683

0.1789 8.89 0.9733

0.2 10.0 0.9769

10 data points entered.

## Data for Non-Constant Combo: mirate (mirna+ate)

**Dose mirna Dose ate Effect**

0.01 0.01 0.32318

| Dose mirna | Dose ate | Effect  |
|------------|----------|---------|
| 0.0311     | 1.12     | 0.44847 |
| 0.0522     | 2.23     | 0.49304 |
| 0.0733     | 3.34     | 0.51610 |
| 0.0944     | 4.45     | 0.53018 |
| 0.1156     | 5.56     | 0.53967 |
| 0.1367     | 6.67     | 0.54648 |
| 0.1578     | 7.78     | 0.55162 |
| 0.1789     | 8.89     | 0.55563 |
| 0.2        | 10.0     | 0.55885 |

10 data points entered.

Data for Non-Constant Combo: mda (mirna+dox+ate)

| Dose mirna | Dose dox | Dose ate | Effect  |
|------------|----------|----------|---------|
| 0.01       | 0.01     | 0.01     | 0.32890 |
| 0.0311     | 1.12     | 1.12     | 0.83052 |
| 0.0522     | 2.23     | 2.23     | 0.95271 |
| 0.0733     | 3.34     | 3.34     | 0.97687 |
| 0.0944     | 4.45     | 4.45     | 0.98529 |
| 0.1156     | 5.56     | 5.56     | 0.98933 |
| 0.1367     | 6.67     | 6.67     | 0.99164 |
| 0.1578     | 7.78     | 7.78     | 0.99312 |
| 0.1789     | 8.89     | 8.89     | 0.99414 |
| 0.2        | 10.0     | 10.0     | 0.99488 |

10 data points entered.

Median-Effect Plot for Drugs

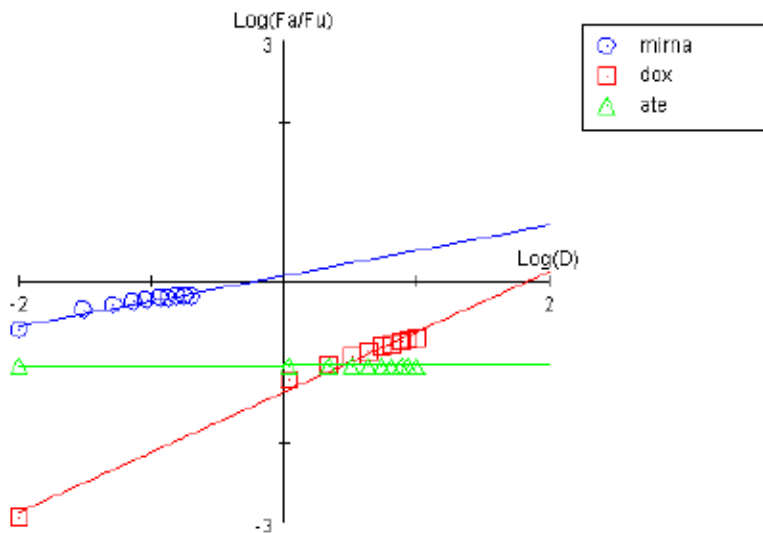

## Median-Effect Plot for Drug Combos

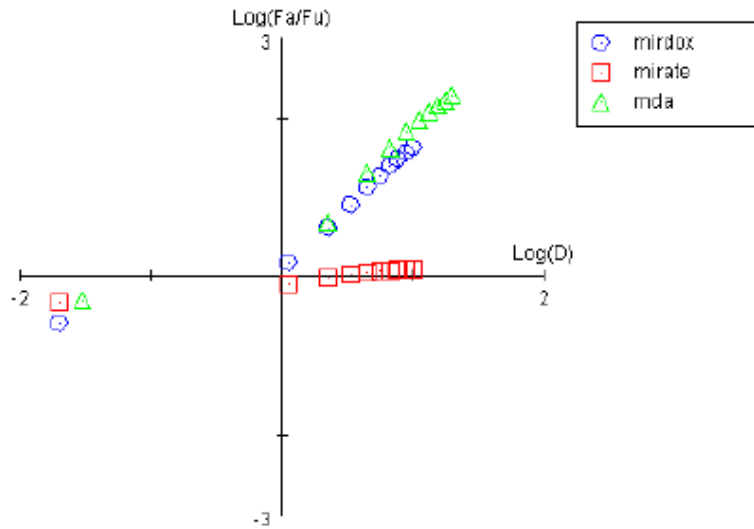

## CI Data for Non-Constant Combo: mirdox (mima+dox)

| Dose mirna | Dose dox | Effect | CI      |
|------------|----------|--------|---------|
| 0.01       | 0.01     | 0.2064 | 1.37989 |
| 0.0311     | 1.12     | 0.5982 | 0.02627 |
| 0.0522     | 2.23     | 0.7995 | 0.00655 |
| 0.0733     | 3.34     | 0.8892 | 0.00335 |
| 0.0944     | 4.45     | 0.9291 | 0.00224 |
| 0.1156     | 5.56     | 0.9493 | 0.00172 |
| 0.1367     | 6.67     | 0.9609 | 0.00143 |
| 0.1578     | 7.78     | 0.9683 | 0.00125 |
| 0.1789     | 8.89     | 0.9733 | 0.00112 |
| 0.2        | 10.0     | 0.9769 | 0.00104 |

## CI Data for Non-Constant Combo: mirate (mirna+ate)

| Dose mirna | Dose ate | Effect  | CI      |
|------------|----------|---------|---------|
| 0.01       | 0.01     | 0.32318 | 0.19766 |
| 0.0311     | 1.12     | 0.44847 | 0.11207 |
| 0.0522     | 2.23     | 0.49304 | 0.10613 |
| 0.0733     | 3.34     | 0.51610 | 0.11095 |
| 0.0944     | 4.45     | 0.53018 | 0.11930 |
| 0.1156     | 5.56     | 0.53967 | 0.12933 |
| 0.1367     | 6.67     | 0.54648 | 0.14007 |
| 0.1578     | 7.78     | 0.55162 | 0.15131 |
| 0.1789     | 8.89     | 0.55563 | 0.16287 |
| 0.2        | 10.0     | 0.55885 | 0.17465 |

## CI Data for Non-Constant Combo: mda (mirna+dox+ate)



| Dose mirna | Dose dox | Dose ate | Effect  | CI      |
|------------|----------|----------|---------|---------|
| 0.01       | 0.01     | 0.01     | 0.32890 | 0.18226 |
| 0.0311     | 1.12     | 1.12     | 0.83052 | 0.00241 |
| 0.0522     | 2.23     | 2.23     | 0.95271 | 6.27E-4 |
| 0.0733     | 3.34     | 3.34     | 0.97687 | 3.47E-4 |
| 0.0944     | 4.45     | 4.45     | 0.98529 | 2.49E-4 |
| 0.1156     | 5.56     | 5.56     | 0.98933 | 2.02E-4 |
| 0.1367     | 6.67     | 6.67     | 0.99164 | 1.74E-4 |
| 0.1578     | 7.78     | 7.78     | 0.99312 | 1.56E-4 |
| 0.1789     | 8.89     | 8.89     | 0.99414 | 1.44E-4 |
| 0.2        | 10.0     | 10.0     | 0.99488 | 1.35E-4 |

Combination Index Plot

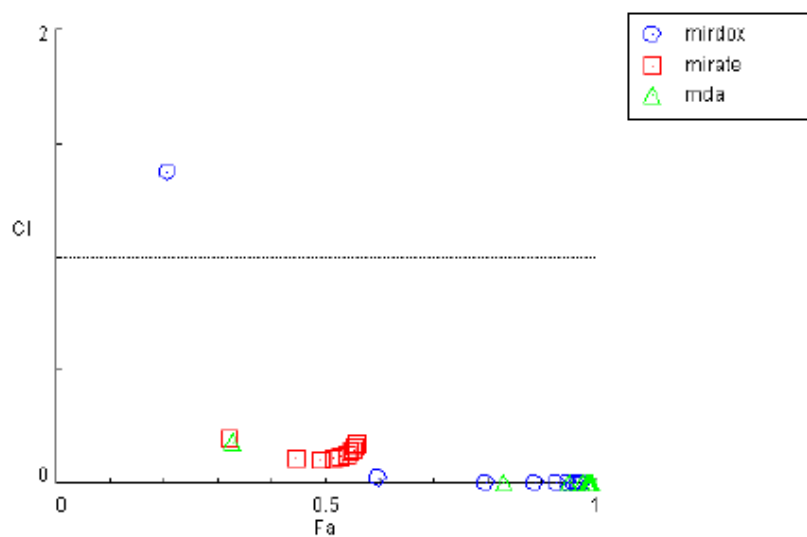

Supplement: Supplementary file [file media-1.pdf]
